6-02-2021

1  
2 **Entrainment of Endangered Sturgeon by a Large Water Diversion:**  
3 **Rescue, Enumeration, and Conservation Opportunities**

4  
5  
6 K. Jack Killgore<sup>1\*</sup>, Jan Jeffrey Hoover<sup>1</sup>, William Todd Slack<sup>1</sup>, Steven G. George<sup>1</sup>, and Christopher  
7 G. Brantley<sup>2#a</sup>  
8  
9

10 <sup>1</sup> U. S. Army Corps of Engineers, Engineer Research and Development Center, Environmental  
11 Laboratory, Vicksburg, Mississippi, United States of America  
12

13 <sup>2</sup> U. S. Army Corps of Engineers, New Orleans District, New Orleans, Louisiana, United States of  
14 America  
15

16  
17 #a Current Address: JESCO Environmental & Geotechnical Services, Inc., Mobile, Alabama, United  
18 States of America  
19

20  
21  
22  
23  
24  
25  
26 \* Corresponding author

27 E-mail: jack.killgore@usace.army.mil  
28  
29  
30

6-02-2021

31

## Abstract

32 The Bonnet Carre' Spillway diverts water from the Mississippi River through a floodway into Lake  
33 Pontchartrain to reduce river stages at New Orleans and prevent flood damages. Pallid Sturgeon, a  
34 federally listed species under the Endangered Species Act, and Shovelnose Sturgeon, listed under the  
35 Similarity of Appearance rule, are entrained through the Spillway structure and become trapped in  
36 the Spillway canals and other waterbodies. Five openings and corresponding rescue operations  
37 occurred between 2008 and 2019 after each Spillway closure. Operational parameters spanned a  
38 range of water temperatures and seasons with magnitude and duration of discharge varying across all  
39 openings. A total of 70 days with crew number ranging from 6 to 12 were expended to rescue 57  
40 Pallid Sturgeon and 362 Shovelnose Sturgeon after the five openings that spanned 240 total days.  
41 More sturgeon were entrained at higher water temperatures, with greater numbers of bays opened,  
42 and for longer periods of time. Recovery of sturgeon is initially high but over time declines as  
43 sturgeon are depleted from the floodway, stranded in isolated waterbodies in the floodway, and/or  
44 displaced further downstream into Lake Pontchartrain during longer openings. Sturgeon that cannot  
45 find their way back to the floodway are unlikely to be rescued. Recent population studies indicate  
46 that less than 1% of the total population size in the Lower Mississippi River are entrained. However,  
47 this does not take into account those individuals entrained but not captured and the potential impacts  
48 of more frequent openings of the structure. Conservation recommendations are provided to increase  
49 catch efficiency and recovery of the endangered sturgeon.

50

## Introduction

51 Large-scale interbasin water transfer projects occur worldwide for various purposes including  
52 domestic water supply, energy production, agricultural irrigation, marsh restoration, and flood  
53 control (Sternberg 2016; Shumilova1 2018 ). One of the largest interbasin freshwater diversions in  
54 the United States is the Bonnet Carré Spillway (BCS) on the Lower Mississippi River 53 river  
55 kilometers upstream of New Orleans, LA (Figure 1). The BCS structure, constructed by the U. S.  
56 Army Corps of Engineers as a flood risk management feature following the Mississippi River Flood  
57 of 1927, is a needle-controlled dam 2347 m in length and the design discharge capacity is 7079 cubic  
58 meters per second (cms) (U.S. Army Corps of Engineers 1998). It diverts water from the Mississippi

6-02-2021

59 River to prevent river discharges downstream towards New Orleans in excess of 35,400 cms, into a  
60 floodway that empties into Lake Pontchartrain, a shallow, brackish lagoon. Typically, Mississippi  
61 River water is < 2 ppt salinity (USGS Gage 7374000, Mississippi River at Baton Rouge), whereas in  
62 Lake Pontchartrain ranges from 1.2 to 5.4 ppt salinity (Sikora and Kjerfve 1985).

63 As of 2019, the BCS has been operated fourteen times (Figure 2). Frequency of operations between  
64 1937 and 2008 occurred at 2-23 year intervals, most between 4-14 years, and averaged overall once  
65 every 8.9 years, or just over 1% during that time period. Duration of openings ranged from 13 days  
66 in 1975 to 79 days during the second opening of 2019. Number of bays open each day ranged from  
67 1935 in 1975 to 22204 in 1973. Since 2008, operations have occurred at 1-5 year intervals, averaging  
68 2.7 years overall, or about 5% during that time period. Record floods have occurred in the Lower  
69 Mississippi River over the last decade necessitating openings of the BCS at a three-five times greater  
70 frequency than historic operations. In addition to increased frequency of operation, magnitude and  
71 duration of flooding are also increasing. The 2011 flood set new stage records at multiple locations  
72 along the Lower Mississippi River. The 2019 flood was the longest in modern history, and for the  
73 first time, the Spillway was opened twice in the same year.

74 Entrainment risk has been evaluated for Green Sturgeon (*Acipenser medirostris*) through agricultural  
75 diversion pipes (Mussen et al 2014), Lake Sturgeon through a hydroelectric station (McDougall et al.  
76 2014), White (*Acipenser transmontanus*) and Pallid Sturgeon (*Scaphirhynchus albus*) in the vicinity  
77 of dredges (Boysen and Hoover 2009; Hoover et al. 2011), and an overall synthesis on interactions  
78 between sturgeon and water resource development including sturgeon entrainment and impingement  
79 (Cooke et al. 2020). However, effects of flood control diversion openings on imperiled sturgeon  
80 species in the Mississippi River have not been described. The fish cannot pass back into the river  
81 once water level drops sufficiently below the backside of the weir sill. This can happen as the BCS  
82 structure is closed, restricting water into the floodway or with bays open on the structure and falling  
83 stages on the Mississippi River. It is believed that as a lotic freshwater species, sturgeon will be  
84 unable to survive long-term in the lentic brackish environments of the Lake Pontchartrain system.  
85 Therefore, it is assumed conservatively that entrained sturgeon represent impacts to the source  
86 population in the river.

6-02-2021

87 After the structure was closed in 2008, a decision was made by the U.S. Army Corps of Engineers,  
88 New Orleans District to sample water bodies within the BCS for Pallid Sturgeon (*Scaphirhynchus*  
89 *albus*), listed federally as endangered under the Endangered Species Act, as well as the Shovelnose  
90 Sturgeon (*Scaphirhynchus platyrhynchus*), which are sympatric with Pallid Sturgeon and in 2010  
91 were listed as a threatened species under the “Similarity of Appearances” provisions of the  
92 Endangered Species Act only in those areas where they co-occur with Pallid Sturgeon (Figure 3).  
93 Under section 7 of the Endangered Species Act, all federal agencies are responsible to ensure that  
94 actions they authorize, fund, or carry out are not likely to jeopardize the continued existence of any  
95 listed species. Principal objectives of this effort were to rescue entrained Pallid Sturgeon, return  
96 them to the Mississippi River, and to enumerate impacts to the population. Rescue operations  
97 comply with the ESA and have been found to be effective for other species of sturgeon. Telemetry  
98 and modeling studies showed that rescue can provide nearly complete mitigation for population  
99 impacts of entrained Green Sturgeon (Thomas et al. 2013).

100

101 Within the first hour of sampling in 2008, a Pallid Sturgeon was captured in a BCS canal  
102 downstream of the structure inaugurating a series of sampling and rescue events after the structure  
103 was operated each time in 2008, 2011, 2016, 2018, and 2019. Intense and equitable sampling was  
104 required during each operation to evaluate impacts to the species and to evaluate the relationships  
105 between numbers of sturgeon entrained with functional parameters of the structure, specifically  
106 onset, magnitude, and duration of flooding and operation. This article summarizes the number of  
107 sturgeon collected after each of the five openings. It also provides data on sturgeon movements and  
108 habitat quality. It identifies differences in catch among the openings based on environmental and  
109 operational conditions, estimates potential impacts to population abundance, and recommends  
110 sampling requirements and strategies for future openings to maximize catch and minimize mortality  
111 of entrained sturgeon.

112

113

### Study Area

114

115 The BCS was built in 1929-31 by the U.S. Army Corps of Engineers on the east side of the  
116 Mississippi River near the site of the former Bonnet Carré Crevasse 53 river km above New Orleans.

6-02-2021

117 It is recognized by the American Society of Civil Engineers as a Historic Civil Engineering  
118 Landmark and eligible for listing on the National Register of Historic Places. The BCS structure is  
119 2347 m long with 350 concrete bays (or weirs) each 6.1 m in length. There are 176 bays with a weir  
120 elevation of 5.15 m N.G.V.D (National Geodetic Vertical Datum) (i.e., high bays) and the remaining  
121 174 bays have a weir crest elevation of 4.54 m N.G.V.D. (i.e., low bays). Each bay is closed with 20  
122 timber needles (also referred to as pins) measuring 29-30 cm in width and either 3 m or 3.7 m in  
123 length depending on the elevation of the weir crest. Needles are inserted vertically across each bay  
124 while the Spillway is closed. During openings, a travelling gantry crane mounted on narrow-gage  
125 tracks on top of the BCS structure lift the pins from the bay allowing Mississippi River water to pass  
126 unimpeded into the floodway (Figure 1). Pins are stored above each bay during operations.  
127 Discharge through the BCS is regulated by the number of bays opened or closed on the structure.  
128 The bays allow flow directly into a stilling basin approximately 15 m wide with three rows of low  
129 concrete baffles next to a heavy articulated concrete mat 53 to 69 m wide to dissipate the flow  
130 energy. Floodwaters are then directed into a leveed floodway conveying water from the weir  
131 structure into Lake Pontchartrain.

132  
133 The 3085 hectare floodway is 9.2 km in length confined by levees that are 2.3 km wide at the river  
134 end and 3.8 km wide at the lake end. According to the Master Plan (USACE 1998), the lands in the  
135 floodway are characteristic of an alluvial floodplain that vary in elevation from 3 meters near the  
136 river to mean sea level at Lake Pontchartrain. The Convent-Commerce soils series consist of soft  
137 organic clays with layers of silt and peat, and high water content that support grasses and sedges.  
138 Bottomland hardwood forest comprise approximately 40% of the total project acreage while the  
139 remainder of the floodway is mostly disturbed land with little vegetation following opening and  
140 closing of the structure. When the structure is closed but still leaking through the pins, the Y-canal  
141 and Barbar's canal drain the majority of water into two large borrow canals at the lower half of the  
142 floodway that empty into Lake Pontchartrain (Figure 4). In addition, over 25 shallow ponds created  
143 by sand excavation activities are scattered across the floodway.

144  
145 The structure is operated once the discharge on the Mississippi River reaches and is expected to  
146 exceed 35400 cms. After structure closure, if Mississippi River levels are above the concrete weir,

6-02-2021

147 water can continue to pass over the weir and through the openings between pins in the closed bays.  
148 This movement of water through the closed structure is commonly called leakage and can often  
149 maintain a shallow (0.5 – 1 m) sheet flow across upper portions of the floodway. Pin leakage at high  
150 elevation bays cease flowing at 5.15 m at the Bonnet Carre' gage, which also eliminates sheet flow  
151 and allows vehicular access to sampling sites. Low bays continue to leak until gage reading is at  
152 4.54 m eliminating flows through the various canals and ditches. The period of leakage varied each  
153 year and was an important consideration for sampling strategies.

154

155

## Materials and Methods

156 The floodway was sampled after five BCS operations: 2008, 2011, 2016, 2018 and 2019. Each  
157 operation was different in duration, magnitude of discharge passing through the structure, and time  
158 of year (Table 1). There were two separate operations in 2019 resulting in a total of 123 open days.  
159 The 2019 Mississippi River flood was the longest in recorded history reflected by the duration of the  
160 two openings. The highest maximum discharge through the structure occurred in 1945 with a  
161 discharge of 9005 cms followed by a discharge of 8946 cms during the 2011 opening that lasted 43  
162 days. The 2011 flood set new records on maximum discharge at several gages in the Lower  
163 Mississippi River resulting in the higher discharge passed through the Spillway. The remaining three  
164 years had shorter openings (<30 days) and reduced maximum discharge (<6100 cms).

165 Collecting Techniques - The goal was to capture as many Pallid Sturgeon as possible in the BCS and  
166 release them back into the Mississippi River. Collecting effort occurred primarily in the upper end  
167 of the BCS including the canals (Barbar's and Y), ditches, and stilling basin once the high bays  
168 ceased leaking (Figure 4). Floodway lakes were also periodically sampled. Multiple gears and  
169 techniques were used in the various waterbodies and collecting efforts ceased 1-2 days after the last  
170 sturgeon was collected. Collecting efforts were repeated the following week(s) if flow persisted in  
171 the canals due to bay leakage.

172

173 1. Boat-mounted electroshocker – Operated with DC pulse at an output of 4-6 amps at 60 Hz  
174 (targets wide size range of fishes) or 1-2 amps at 15 Hz (targets larger benthic fishes) using a  
175 Smith-Root 7.5 GPP system. Two dip-netters on the bow, and often one behind them, would

6-02-2021

- 176 scan the water surface for immobilized fish, collect all sturgeon, and collect a representative  
177 sample of the fish assemblage. Sturgeon were visible at the surface for only a few seconds  
178 requiring quick reflexes by the dippers. Unit of effort was expressed as minutes  
179 electroshocked.
- 180 2. Gill Nets – Three types of gillnets were used and unit of effort for each was expressed as  
181 hours fished:
- 182 a. A 15.2 to 18-m section of a trammel net (40-m long, 2.4-m deep, with 6.3 cm square  
183 mesh) was set at the end of a 200 m reach of Barbours Canal between upstream  
184 road/culvert crossing and downstream mid-water pipeline crossing prior to  
185 electroshocking and used as a block net to capture or contain fishes during sampling.
- 186 b. Sets of 43 x 3 m experimental mesh (7.6 – 15.2 cm square mesh) gillnets were set in  
187 lakes prior to electroshocking.
- 188 c. A 30.5 x 1.8 m net with 7.6 – 10.2 inch square mesh was set in lakes prior to  
189 electroshocking.
- 190 3. Conventional seine - Smaller ditches were occasionally sampled with a conventional 6.1 m  
191 by 2.4-m seine of 1-cm bar mesh. Unit of effort was expressed as number of hauls
- 192 4. Modified gillnet-seine - A section of a 27.4 m X 1.8 m gill net was used to herd and capture  
193 fishes in the Stilling Basin. A block net with 7.6-cm square mesh was set in the Stilling  
194 Basin at some distance away from the seining operation to increase containment during  
195 seining. The gill net seine had square mesh size ranging from 1.9 to 6.4-cm tied to bamboo  
196 brails on each end. Larger mesh minimized entanglement of spines from small Blue Catfish  
197 (*Ictalurus furcatus*) that were abundantly distributed in the Stilling Basin. A crew would  
198 begin on one end of the Stilling Basin and pull the seine through the larger channel while  
199 other personnel in the two smaller channels between the two rows of baffles would splash the  
200 water to herd fish towards the seine or capture fish with large dipnets. The crew would  
201 periodically stop at the block net to remove and record fish. The block net was moved further  
202 away and seining commenced again until the entire Stilling Basin was sampled. Unit of  
203 effort was expressed as hours seined.
- 204 5. Visual Sightings – Sturgeon were visually sighted in the Stilling Basin by the ground team or  
205 from the gantry crane on top of the structure. Once sighted, the ground team waded into the

6-02-2021

206 basin with castnets or large dipnets to capture the individual. Dead sightings were also  
207 occasionally made in other waterbodies and sturgeon were retrieved.

208 6. Benthic trawls, hoop nets, and trotlines were also used in the flowing channels, but these  
209 gears were eventually dropped due to low catches attributed to entanglement on bottom  
210 obstructions and trash entangled in the nets and trotline hooks.

211

212 Sturgeon Identification - Sturgeon were identified to species, enumerated, and fork length recorded.  
213 Discriminating between Pallid Sturgeon and Shovelnose Sturgeon can be challenging, however  
214 (Figure 3). They co-occur, are morphologically similar and known to hybridize, and they vary  
215 genetically throughout their range (Schrey et al. 2011; Jordan et al. 2019), but results of genetic  
216 studies and of morphological studies frequently yield inconsistent results (e.g., Schrey et al. 2007 vs  
217 Ray et al. 2007; Bailey and Cross, 1954 vs Kuhajda et al., 2007). As a result, the taxonomic status of  
218 Pallid and Shovelnose Sturgeon is contentious. In this study, we delineate Pallid Sturgeon and  
219 Shovelnose Sturgeon on morphological and meristic criteria exclusively, which is consistent with the  
220 typological species concept (Mayr 1996), since these can be determined immediately and objectively  
221 in the field with live specimens, and in accordance with a methodology in our use and by the same  
222 personnel since 1997 (Murphy et al., 2007). Although species determinations were made  
223 morphologically, tissue samples were collected and archived for future genetic analysis.

224

225 A numbered Floy t-bar anchor tag with a toll-free phone number was inserted externally behind the  
226 dorsal fin of all sturgeon collected. Pallid Sturgeon were electronically scanned for the presence of a  
227 Coded Wire Tag to determine if individuals were of hatchery origin from the Missouri River basin  
228 and an Avid Passive Integrated Transponder (PIT) tag indicating recapture. If no tags were detected,  
229 a non-encrypted PIT tag was inserted at the base of the dorsal fin. All sturgeon were transported in  
230 an aerated live well from the BCS and released alive back into the Mississippi River. Dead sturgeon  
231 recovered in the BCS were recorded and all Pallid Sturgeon were preserved and archived at the  
232 Engineer Research and Development Center in Vicksburg, MS or Mississippi Museum of Natural  
233 Science in Jackson, MS.

234



6-02-2021

235 Sturgeon Movements within the floodway – Acoustic telemetry was used to monitor movement of  
236 Shovelnose Sturgeon entrained during the 2011 opening from summer 2011 to summer 2012.  
237 Twelve VEMCO VR2Ws remote receivers were deployed into the BCS down Barbars Canal to Lake  
238 Pontchartrain to establish an automated acoustic telemetry array. Eighteen Shovelnose Sturgeon  
239 ranging in size from 501-830 mm FL were captured from upper Barbars, Y-Canal, and the BCS  
240 stilling basin and equipped with acoustic telemetry tags (V9 coded acoustic transmitters, 289 day  
241 battery life) during the period 20-27 June 2011. Tagged fish were then redistributed within the  
242 system near telemetry buoys (Barbars 1, 2, 4, 5, 8 and Y-Canal 1, see Figure 4).

243  
244 Water quality - After closure, water temperature (°C), dissolved oxygen (mg/l), and turbidity (NTU)  
245 were measured at each sampling site including the canals, Stilling Basin, and lakes with a YSI Pro  
246 DSS. In addition, water quality parameters were assessed in the Stilling Basin routinely following  
247 the closure of the BCS structure in 2018 through 2019 using a YSI Pro DSS. Point measurements  
248 were generally taken daily during early morning hours (0700-0900) from the gantry crane at bays 45,  
249 132 and 306. These measurements were taken to better assess water quality changes, particularly  
250 dissolved oxygen, in the Stilling Basin after low bays stopped leaking to better predict and prioritize  
251 the timing of future rescue operations before conditions worsened.

252  
253 Associations between catch and structure operation – Three variables of the flood regime were  
254 calculated for each opening of the structure: onset (water temperature) in the Mississippi River,  
255 duration (days structure was open), and magnitude (volume of water passed through the structure).  
256 Water temperature of the Mississippi River during each opening was obtain from the USGS gage at  
257 Baton Rouge, LA (07374000). Duration and magnitude was obtained from the U.S. Army Corps of  
258 Engineers New Orleans District. Magnitude was the cumulative value of number of bays open  
259 converted to billion cubic meters of water. Bivariate plots between the three flood regime variables  
260 and sturgeon catch were constructed and linear regression models were calculated. Due to the limited  
261 number of observations, we use these results as exploratory and descriptive tools and not as a  
262 statistically rigorous means of testing hypotheses.

263

264

## Results

6-02-2021

265 Number of sturgeon collected - A total of 70 days with crew number ranging from 6 to 12 were  
266 expended to rescue sturgeon during the five operations (Table 2). Number of days expended per  
267 opening ranged from 5 in 2018 to 25 in 2008. Once the high bays stopped leaking allowing access to  
268 the canals and Stilling Basin, overall effort was dependent on the number of days low bays leaked  
269 after closure. Leakage provided rheophilic cues for upstream movement of sturgeon and maintained  
270 normoxic conditions, but once leakage stopped, water warmed and became hypoxic. Greater effort  
271 occurred in 2008 due to 32 days of leakage compared to 6-9 days in the four other years (Table 2).  
272 However, longer sampling days in 2008 was partly due to the development of novel sampling  
273 strategies to maximize catch, which were later refined during subsequent openings.

274 Electroshocking was the most effective gear to catch sturgeon in the canals and lakes, ranging from  
275 2.7 hours in 2018 to 15 hours in 2008. Thirty-six percent of the Pallid Sturgeon were collected by  
276 electroshocking. Gillnets and trammel nets were set in the canals and lakes for a total of 372 hours  
277 over the five openings collecting 22% of the Pallid Sturgeon. The modified gillnet-seine was pulled  
278 for a total of 63.5 hours primarily in the Stilling Basin collecting 15% of the Pallid Sturgeon.  
279 Castnets and dipnets collected 13% and 11% of the Pallid Sturgeon, respectively. Other techniques  
280 accounted for less than 5%. Gear efficiency was similar for Shovelnose Sturgeon.

281 A total of 57 Pallid Sturgeon and 362 Shovelnose Sturgeon were collected after the five operations  
282 (Table 1). Fork length (mm) ranged from 528-1038 and 384-928 for Pallid and Shovelnose  
283 Sturgeons, respectively. A notable collection was a tagged Pallid Sturgeon originally captured in the  
284 floodway during 2008, released back into the Mississippi River, and recaptured in the floodway in  
285 2011. Number of Pallid Sturgeon collected ranged from zero in 2016 after the winter opening to 20  
286 in 2011. Shovelnose Sturgeon were also not collected in 2016 but 219 individuals were collected in  
287 2019, almost 3 times the number collected in other years.

288 Sturgeon movements within the floodway – The telemetry array was deployed from 20 June 2011  
289 through 25 August 2012 and accumulated over 120,000 detections. No mortalities were observed  
290 following the tagging period and initially all individuals moved extensively near their original  
291 release point. The initial acoustic array (n = 10 receivers) within the floodway was deployed on 20  
292 June 2011 prior to sampling. The remaining receivers near Lake Pontchartrain, two new receivers

6-02-2021

293 and one receiver relocated from the upper floodway, were not deployed until 13 July. This created  
294 an “open window” for undocumented movement into Lake Pontchartrain with 6 individuals  
295 unaccounted for after 13 July suggesting they moved quickly through the floodway and into Lake  
296 Pontchartrain before the final receivers were deployed. None were documented returning to the  
297 floodway. Alternatively, the lack of detections during this period could be due to tag failure. Those  
298 fish that remained in the system experienced sporadic, localized movement with no detection  
299 patterns to support movement of telemetry tagged individuals from the BCS into Lake Pontchartrain  
300 after 13 July. However, overall movement of telemetry tagged fish began to decrease by early  
301 August, as water levels within the floodway decreased, in part creating isolated pools and remnant  
302 channels, and as water temperatures increased (31° C). This pattern of decreased movement was  
303 also likely in response to the loss of rheophilic cues as bay leakage at the BCS was minimal to none  
304 resulting in decreased water flow through the entire floodway. Salinity during this period where the  
305 floodway enters Lake Pontchartrain was  $\geq 2$  ppt; detections during this period on the receivers  
306 nearest to Lake Pontchartrain were few to none.

307 Water quality - The structure was operated in late winter (2016 and first opening of 2019), spring  
308 only (2008, 2011, and 2018), and spring into mid-summer (second opening of 2019). As a result,  
309 mean water temperature in the floodway varied from 10.8 C during the winter operation of 2016 to a  
310 high of 30.8 C in 2019 when the operation extended into the summer. However, mean water  
311 temperature in the Mississippi River was consistently lower when the structure was open compared  
312 to measurements taken after closure (Table 1). Temperature difference was most pronounced in 2018  
313 when the floodway was 11°C higher compared to the river. Although mean dissolved oxygen in the  
314 floodway was normoxic during all years, diel fluctuations did occur in the stilling basin and lakes  
315 resulting in hypoxic (< 3 mg/l) conditions.

316 Leakage through the bays during closure occurs most years, ranging from near zero in 2012 and  
317 2014 to 60% during 2019, affecting water quality in the stilling basin and canals (Figure 5). Leakage  
318 of Mississippi River water into the BCS moderates temperatures and prevents hypoxia. Water quality  
319 monitoring in the stilling basin during 2018 and 2019 clearly showed a rapid decrease in dissolved  
320 oxygen when the low bays quit leaking (Figure 6). Once the low bays quit leaking in August, the  
321 stilling basin became hypoxic during part of the day creating physiological stress on trapped sturgeon

6-02-2021

322 and other fish species leading to fish kills. Mississippi River stage elevations are monitored to  
323 determine when leaking through the low bays will end ensuring that rescue operations in the stilling  
324 basin are scheduled accordingly.

325 Associations between sturgeon catch and structure operations – Numbers of Pallid and Shovelnose  
326 Sturgeon collected were positively correlated with onset (i.e., date of initial opening), duration, and  
327 magnitude of Bonnet Carré openings with coefficients of determination ranging from  $R^2=0.58$  to  
328  $R^2=0.99$ . (Figure 7). For Pallid Sturgeon, correlation was highest for onset. Entrainment risk is  
329 negligible at water temperatures below 10 °C and high as water temperatures increase above 20 °C.  
330 The duration and magnitude of openings were more curvilinear, suggesting that number of individual  
331 Pallid Sturgeon tended to plateau after prolonged openings. For Shovelnose Sturgeon, correlation  
332 was highest for duration, indicating that depletion of the riverine population was less likely for the  
333 more abundant Shovelnose Sturgeon. The variation in catch of Shovelnose Sturgeon between 2019  
334 and 2011 as a function of water volume passing through the structure also indicates that number  
335 entrained may continue to increase as magnitude increases.

336

## Discussion

337 Rescuing Pallid Sturgeon from waterbodies in the BCS required perseverance under constantly  
338 changing conditions even on a daily basis. The five openings of the BCS had different operating and  
339 environmental conditions, and as a result, different outcomes in the number of sturgeon collected. A  
340 major consideration for sampling was the amount and duration of leakage through the bays that  
341 maintains discharge in the canals. Bay leakage depends on Mississippi River stage elevation relative  
342 to the crest of the high and low bays. Pallid and Shovelnose Sturgeon are inherently strongly  
343 rheotactic (Adams et al. 1998, 1999; Parsons et al., 2003; Hoover et al. 2011). Consequently, they  
344 will orient in the direction of the flow towards the structure. As flow declines and bay leakage  
345 diminishes, canals and shallow lakes become isolated due to accretion of sediment plugs during the  
346 opening of the structure creating potential barriers to upstream passage. Without flow, sturgeon may  
347 become trapped in hypoxic lakes and canals in the floodway or wander into Lake Pontchartrain  
348 where they likely perished due to the inability to osmoregulate in saline waters. Longer flow duration  
349 in the canals will lead to higher capture rates.

6-02-2021

350

351 No sturgeon were captured after the 2016 openings when water temperatures were much colder and  
352 apparently fish were not moving along the channel border of the Mississippi River where they are  
353 more susceptible to entrainment. Pallid and Shovelnose Sturgeon catch rates in the Mississippi River  
354 on trotlines generally increase as water temperature approaches 10 °C (Killgore et al. 2007). The  
355 mean water temperature of the Mississippi River during January and February 2016 when the  
356 spillway was open ranged from 7.5 to 7.8 °C (USGS gage 07374000, Baton Rouge, LA). Although  
357 mean water temperature in the spillway during rescue operations was 10.8 °C (Table 1), colder  
358 temperatures in the river persisted during the opening period when sturgeon are more inactive.  
359 Higher temperatures during other operations resulted in more sturgeon entrained, particularly  
360 Shovelnose Sturgeon that were caught more frequently than Pallid Sturgeon when temperatures rise  
361 above 20 C (Killgore et al. 2007). Pallid Sturgeon occupy the main channel primarily during low  
362 river stage and warm temperature conditions that occur in summer and early autumn according to a  
363 telemetry study in the Lower Mississippi River (Herrala et al. 2014). At higher river stages, both  
364 species may be more inclined to move along the channel border closer to the spillway regardless of  
365 water temperature.

366

367 Sturgeon approaching the open spillway encounter entrainment velocities as water overtops the  
368 concrete weir, which can exceed 2 m/s (USACE New Orleans District, personnel communication).  
369 Adult Shovelnose Sturgeon and presumably Pallid Sturgeon exploit boundary-layers along the  
370 substrate to effectively move or hold position in fast-flowing rivers. Both species, in laboratory  
371 studies, show relatively weak prolonged swimming ability. Adult Shovelnose Sturgeon have 60-  
372 minute and 15-minute critical swimming speeds of only 0.6 m/s and 0.6-1.2 m/s in open water,  
373 respectively, and 1.3-1.7 m/s in boundary layers (Parsons et al., 2003; Hoover et al., 2011; Adams et  
374 al., 1997). Juveniles of both species have 30-min critical swim speeds < 0.4 m/s (Adams et al.,  
375 1999; Adams et al, 2003). Relative weak swimming capability in the vicinity of fast entrainment  
376 velocities render these species vulnerable to entrainment anywhere near the structure. Differences in  
377 swimming behavior between the two species have been noted, however, which may increase  
378 vulnerability to entrainment. Shovelnose Sturgeon tend to free-swim in the water column when  
379 reaching higher swimming speeds compared to Pallid Sturgeon that hunker down (Adams et al

6-02-2021

380 2003). Free-swimming would increase risk of entrainment compared to skimming along the  
381 substrate or station holding.

382

383 Nineteen Pallid Sturgeon were collected in 2019, similar to 2011, whereas 239 Shovelnose Sturgeon  
384 were collected in 2019 almost 3 times higher than 2011 when 78 Shovelnose Sturgeon were  
385 collected. The Pallid to Shovelnose ratio in the lowermost reach of the lower Mississippi River is  
386 typically 1:3 (Killgore et al. 2007) but was 1:12.6 in 2019 (Table 1). Although the 2019 openings  
387 from February to April and May to July may have coincided with one or more major movements and  
388 dispersal of Shovelnose Sturgeon, depletion of Pallid Sturgeon in the vicinity of the structure is also  
389 a consideration. Number of Pallid Sturgeon collected was similar in 2011 and 2019 when the highest  
390 water volumes passed through the structure suggesting a depletion of individuals that could be  
391 entrained. Conversely, number of Shovelnose Sturgeon collected was variable at higher water  
392 volumes suggesting that numbers entrained may continue to increase at even higher volumes passing  
393 through the structure (Figure 7).

394

395 The stilling basin becomes a hypoxic death trap for sturgeon after bays stop leaking. It is a  
396 rectangular concrete structure 2,347 m long, 9.1 m wide, averaging 1.2 m in depth, and holds water  
397 year around. There is no escape for stranded fish unless bays begin leaking again to a point that  
398 reconnects the downstream canals as Mississippi River stages rise. Of the 57 Pallid Sturgeon  
399 collected during the five openings, four were dead with one found in the stilling basin. Of the 362  
400 Shovelnose Sturgeon collected, 98 were found dead, and of these, 92% were collected in the stilling  
401 basin. Fish kills typically occur in the stilling basin after each operation as water temperature rises  
402 and dissolved oxygen decreases but are often species-specific. For example, tens of thousands of  
403 Skipjack Herring (*Alosa chrysochloris*) became stranded in the stilling basin and died in 2018.  
404 Sturgeon are also sensitive to low dissolved oxygen and hypoxic conditions impair their respiratory  
405 metabolism, foraging activity, and growth rates (Cech and Doroshov 2004). Blevins (2011) reported  
406 that recruitment of Pallid Sturgeon in the Missouri River may be limited by high summer water  
407 temperatures in excess of 30 °C and dissolved oxygen concentrations less than 2 mg/l in late spring  
408 and summer. Therefore, rescue operations in the stilling basin must begin before water becomes hot  
409 and hypoxic to minimize sturgeon mortality (Figure 8).

6-02-2021

410 Entrainment risk is related to duration and seasonality of openings. Capture rate is initially high but  
411 over time declines. Several reasons could explain this trend. Sampling efficiency and effort varies  
412 among collection periods. However, the most likely explanations are that sturgeon are displaced  
413 further downstream in the floodway, become trapped in isolated waterbodies, lack rheophilic cues as  
414 flow subsides, or wander into Lake Pontchartrain during longer openings and cannot find their way  
415 back into the spillway where they are more likely to be rescued. This suggests that the number  
416 captured in the spillway after closure is an underestimate of the total number entrained. A  
417 conservative estimate of Pallid Sturgeon age 3+ population size in the 1,931-km reach of the  
418 Mississippi River below the confluence of the Missouri River ranged from 4.5–15 fish per river  
419 kilometer or a total of 4,600 to 15,000 (Friedenberg et al. 2017). Hintz et al. (2016) estimated  
420 population size of Pallid and Shovelnose Sturgeon in the Middle Mississippi River, a 322-km reach  
421 between the confluences of the Missouri and Ohio Rivers, at 1,516 (5 individuals/rkm) and 82,336  
422 (266 individuals/rkm), respectively. The annual population estimate for wild Pallid Sturgeon in an  
423 877-km reach of the Lower Missouri River varied from 5.4 to 8.9 fish/rkm, whereas the estimate for  
424 known hatchery-reared fish varied from 28.6 to 32.3 fish/rkm (Steffensen et al. 2012). The relatively  
425 small number of Pallid and Shovelnose Sturgeon rescued from the BCS represent less than 1% of the  
426 total population size in the Lower Mississippi River with even the lowest estimates. However, adding  
427 hundreds that may have been entrained but not captured could lead to impacts on overall population  
428 size if the BCS continues to be opened on a more frequent basis.

429 Under the authority of the Federal Endangered Species Act, the USFWS has issued several Section 7  
430 “No jeopardy biological opinions” on opening the Bonnet Carre’, which essentially means that  
431 entrainment of Pallid and Shovelnose Sturgeon through the structure is not likely to jeopardize their  
432 continued existence. However, Section 7(a)(1) of the Act directs Federal agencies to “utilize their  
433 authorities to further the purposes of the Act by carrying out conservation programs for the benefit of  
434 endangered and threatened species.” Conservation recommendations are discretionary agency  
435 activities to minimize or avoid adverse effects of a proposed action on listed species or critical  
436 habitat, to help implement recovery plans, or to develop information. Based on this study,  
437 recommended conservation measures include:

6-02-2021

- 438 a. Continue rescue operations after each operation using the collecting methods and timing  
439 made in this article,
- 440 b. Maintain or construct a defined channel (s) in the upper reach of the floodway with  
441 adequate depths to enhance directional cues for sturgeon moving back towards the  
442 structure and to provide long-term navigability for collection vessels once the structure is  
443 closed,
- 444 c. Use pumps and/or siphons to transfer river water and circulate the Stilling Basin when  
445 Mississippi River water levels drop below the concrete weir on the structure to improve  
446 water quality conditions thereby reducing stress on entrained sturgeon prior to rescue,  
447 and,
- 448 d. Utilize acoustic telemetry to evaluate movement rates and patterns in the floodway, as  
449 well as dispersal potential into Lake Pontchartrain. Acoustic tags can be implanted in  
450 Shovelnose Sturgeon as surrogates for Pallid Sturgeon.

451 There is no doubt that the BCS will operate again as flood frequencies increase in the Lower  
452 Mississippi River. Multiple observations have confirmed that the capture of entrained sturgeon and  
453 other chondrosteian fish in the floodway and release back into the Mississippi River is a viable  
454 solution to reduce population impacts. Injury from freefall from passing over a spillway causing  
455 abrasions and scrapes may affect survival (Rytwinski et al. 2017). However, the recapture of a Pallid  
456 Sturgeon in 2011 (this study) indicates annual survival of rescued individuals and all sturgeon  
457 released back into the Mississippi River swam away under their own volition. Furthermore, an adult  
458 Paddlefish (*Polydon spathula*) entrained through the structure in 2011, which was injured and  
459 underweight, and recaptured eight months later in northern Mississippi near Greenville, 627 km  
460 upriver from where it was released, indicates that a large entrained fish, trapped for several days in a  
461 hyperthermic and hypoxic habitat, can be viable when returned to the river (Hoover et al., 2013).  
462 The experience gained over the past 5 operations will ensure that rescue operations will continue in  
463 an effective manner and compliance with the Endangered Species Act will be one of the priorities in  
464 fighting floods on the Lower Mississippi River.

465



6-02-2021

466

467

### **Acknowledgments**

468 Logistical requirements of this study required a large number of agencies and individuals assisting  
469 with sturgeon rescue operations and permitting: U. S. Army Corps of Engineers New Orleans  
470 District / Bonnet Carre Staff - Richard Boe, Michael Brown, Tony Catalanotto, Richard Cusimano,  
471 Rob Heffner, Emile "Skip" Jacobs, Tim Lacoste, Howard Ladner, Bill Maus, John "Rusty" Munson,  
472 Thomas Parker, Michael Saucier, and Steve Stone; Louisiana Department of Wildlife and Fisheries -  
473 Matt Duplessis, Robby Maxwell, Patrick Morris, Alex Perret, Tim Ruth, Brac Salyers, Jeff  
474 Thompson, Gary Vitrano, and Jonathan Winslow; U.S. Fish and Wildlife Service - Debbie Fuller,  
475 Paul Hartfield, Monica Sikes, Rob Smith, Karen Soileau, David Walther; Nicholls State University -  
476 Stephen Byrne, Chris Levron, Dave Shultz, and Clint Troxler; U.S. Army Engineer Research and  
477 Development Center - Krista Boysen, Jay Collins, Nicky Faucheux, Chris Giesler, Alan  
478 Katzenmeyer, Phil Kirk, Bill Lancaster, Bradley Lewis, Catherine Murphy, Amanda Oliver, and Max  
479 Wamsley. Funding was provided by the U. S. Army Corps of Engineers New Orleans District and  
480 the Mississippi River Geomorphology and Potamology Program at the U. S. Army Mississippi  
481 Valley Division.

482

6-02-2021

## Literature Cited

- 483  
484  
485 Adams, R., G. P. Parsons, J.J. Hoover, and K.J. Killgore. 1998. Observations of swimming ability in  
486 shovelnose sturgeon (*Scaphirhynchus platyrhynchus*). *Journal of Freshwater Ecology* 12: 631-633.  
487  
488 Adams, S.R., J.J. Hoover, and K.J. Killgore. 1999. Swimming endurance of juvenile pallid  
489 sturgeon, *Scaphirhynchus albus*. *Copeia* 1999: 807-807.  
490  
491 Adams, S. Reid, Ginny L. Adams, and Glenn R. Parsons. 2003. Critical swimming speed and  
492 behavior of juvenile shovelnose sturgeon and pallid sturgeon. *Transactions of the American Fisheries*  
493 *Society* 132 (2): 392-397.  
494  
495 Bailey, R. M., and F. B. Cross. 1954. River sturgeons of the American genus *Scaphirhynchus*:  
496 characters, distribution, and synonymy. *Papers of the Michigan Academy of Science, Arts, and*  
497 *Letters* 39:169–208.  
498  
499 Blevins, D.W., 2011, Water-quality requirements, tolerances, and preferences of pallid sturgeon  
500 (*Scaphirhynchus albus*) in the lower Missouri River: U.S. Geological Survey Scientific  
501 Investigations Report 2011–5186, 20 p.  
502  
503 Boysen, K. A. and J. J. Hoover. 2009. Swimming performance of juvenile white sturgeon (*Acipenser*  
504 *transmontanus*): Training and the probability of entrainment due to dredging. *Journal of Applied*  
505 *Ichthyology* 25:54 – 59.  
506  
507 Cech J.J., and S. I. Doroshov. 2004. Environmental Requirements, Preferences, and Tolerance Limits  
508 of North American Sturgeons. In: LeBreton G.T.O., Beamish F.W.H., McKinley R.S. (eds)  
509 *Sturgeons and Paddlefish of North America. Fish & Fisheries Series, vol 27. Springer, Dordrecht*  
510  
511 Cooke, S. J., J. J. Cech, D. M., Glassman, J. Simard, S. Louttit, R. J. Lennox, L. Cruz-Font, and C.  
512 M. O’Connor. 2020. Water resource development and sturgeon (Acipenseridae): state of the science

6-02-2021

513 and research gaps related to fish passage, entrainment, impingement and behavioural guidance.  
514 Reviews in Fish Biology and Fisheries 30: 219–244.  
515  
516 Forbes SA, Richardson RE. 1905. On a new shovelnose sturgeon from the Mississippi River. Bull.  
517 Illinois State Lab. Nat. Hist., 7, 37–44.  
518  
519 Friedenber, N.A., J. J. Hoover, K. Boysen, and K. J. Killgore. 2017. Estimating abundance without  
520 recaptures of marked pallid sturgeon in the Mississippi River. Conservation Biology 32(2): 457–465.  
521  
522 Hintz W.D., Glover D.C., Garvey J.E., Killgore K.J., Herzog D.P., Spier T.W., Colombo R.E., and  
523 Hrabik R.A. 2016. Status and habitat use of *Scaphirhynchus* sturgeons in an important fluvial  
524 corridor: implications for river habitat enhancement. Transactions of the American Fisheries Society  
525 145:386–399.  
526  
527 Herrala, J.R., P.T. Kroboth, N. Kuntz, and H. L. Schramm Jr. 2014. Habitat use and selection by  
528 adult Pallid Sturgeon in the Lower Mississippi River, Transactions of the American Fisheries  
529 Society, 143:1,153-163, DOI: 10.1080/00028487.2013.830987  
530  
531 Hoover, J.J., S.G. George, and K.J. Killgore. 2013. A paddlefish entrained by the 2011 Mississippi  
532 River flood: rescue, recapture, and inferred swim speed. Southeastern Nat. 12(4): N26-N30.  
533  
534 Hoover, J.J., J.A. Collins, K.A. Boysen, A.W. Katzenmeyer, and K.J. Killgore. 2011. Critical  
535 swim speeds of adult shovelnose sturgeon in rectilinear and boundary layer flow. Journal of  
536 Applied Ichthyology 27: 226-230.  
537  
538 Hoover, J., K. A. Boysen, J. A. Beard, and H. Smith. 2011. Assessing the risk of entrainment by  
539 cutterhead dredges to juvenile lake sturgeon (*Acipenser fulvescens*) and juvenile pallid sturgeon  
540 (*Scaphirhynchus albus*), Journal of Applied Ichthyology 27: 369-375.  
541

6-02-2021

- 542 Jordan, G. R., E. J. Heist, B. R. Kuhajda, G. R. Moyer, P. Hartfield, and M. S. Piteo. 2019.  
543 Morphological identification overestimates the number of Pallid Sturgeon in the Lower Mississippi  
544 River due to extensive introgressive hybridization. *Transactions of the American Fisheries Society*  
545 148:1004–1023.  
546
- 547 Killgore, K. J., J. J. Hoover, S. G. George, Br. R. Lewis, C. E. Murphy, and W. E. Lancaster. 2007.  
548 Distribution, Relative Abundance, and Movements of Pallid Sturgeon in the Free-Flowing  
549 Mississippi River. *Journal of Applied Ichthyology* 23: 476-483.  
550
- 551 Kuhajda, B. R., R. L. Mayden, and R. M. Wood. 2007. Morphologic comparisons of hatchery-reared  
552 specimens of *Scaphirhynchus albus*, *Scaphirhynchus platyrhynchus*, and *S. albus* × *S. platyrhynchus*  
553 hybrids (Acipenseriformes: Acipenseridae). *Journal of Applied Ichthyology* 23:324–347.  
554
- 555 Mayr, E. 1996. What is a species, and what is not? *Philosophy of Science* 63(2), 262-277.  
556 McDougall CA, Anderson WG, Peake SJ. Downstream passage of lake sturgeon through a  
557 hydroelectric generating station: route determination, survival, and fine-scale movements. *N Am J*  
558 *Fish Manag.* 2014;34:546–58.  
559
- 560 Mussen TD, Cocherell D, Poletto JB, Reardon JS, Hockett Z, et al. 2014. Unscreened Water-  
561 Diversion Pipes Pose an Entrainment Risk to the Threatened Green Sturgeon, *Acipenser medirostris*.  
562 *PLoS ONE* 9(1): e86321. doi:10.1371/journal.pone.008632  
563
- 564 Murphy, C.E., J.J. Hoover, S.G. George, and K.J. Killgore. 2007. Morphometric variation  
565 among river sturgeon (*Scaphirhynchus* spp.) of the Middle and Lower Mississippi River.  
566 *Journal of Applied Ichthyology* 23:313-323.  
567
- 568 Parsons, G. R., J. Hoover, and K.J. Killgore. 2003. Effect of pectoral fin ray removal on station-  
569 holding ability of shovelnose sturgeon. *North American Journal of Fisheries Management*, 23(3),  
570 742-747.  
571

6-02-2021

- 572 Ray, J. M., C. B. Dillman, R. M. Wood, B. R. Kuhajda, and R. L. May-den. 2007. Microsatellite  
573 variation among river sturgeons of the genus *Scaphirhynchus* (Actinopterygii: Acipenseridae): a  
574 preliminary assessment of hybridization. *Journal of Applied Ichthyology* 23:304–312.  
575
- 576 Rytwinski, T., Algera, D.A., Taylor, J.J. et al. What are the consequences of fish entrainment and  
577 impingement associated with hydroelectric dams on fish productivity? A systematic review protocol.  
578 *Environ Evid* 6, 8 (2017). <https://doi.org/10.1186/s13750-017-0087-x>  
579
- 580 Schrey, A. W., R. Boley and E. J. Heist. 2011. Hybridization between pallid sturgeon  
581 *Scaphirhynchus albus* and shovelnose sturgeon *Scaphirhynchus platyrhynchus*. *Journal of Fish*  
582 *Biology* 79:1828 – 1850. Doi:10.1111/j.1095-8649.2011.03123.x.  
583
- 584 Shumilova1 O., K. Tockner, M. Thieme, A. Koska, and C. Zarfl. 2018. Global Water Transfer  
585 Megaprojects: A Potential Solution for the Water-Food-Energy Nexus? *Frontiers in Environmental*  
586 *Science* 6:150. Doi.org/10.3389/fenvs.2018.00150  
587
- 588 Sikora, W. B. and B. Kjerfve. 1985. Factors influencing the salinity regime of Lake Pontchartrain,  
589 Louisiana, a shallow coastal lagoon: analysis of a long-term data set. *Estuaries* 8(2A): 170-180.  
590
- 591 Steffensen K.D., Powell L.A., Pegg M.A. 2012. Population size of hatchery-reared and wild pallid  
592 sturgeon in the lower Missouri River. *North American Journal of Fisheries Management* 32:159–  
593 166.  
594
- 595 Sternberg, T. 2016. Water megaprojects in deserts and drylands. *International Journal of Water*  
596 *Resource Development* 32: 301–320. Doi: 10.1080/07900627.2015.1012660.  
597
- 598 Thomas, Michael J., Matthew L. Peterson, Nick Friedenberg, Joel P. Van Eenennaam, Joseph R.  
599 Johnson, Jan Jeffrey Hoover, and A. Peter Klimley. 2013. Stranding of spawning run green sturgeon  
600 in the Sacramento River: post-rescue movements and potential population-level effects. *North*  
601 *American Journal of Fisheries Management* 33 (2): 287-297.

6-02-2021

- 602
- 603 U. S. Army Corps of Engineers. 1998. Bonnet Carre' Spillway Master Plan. New Orleans District,
- 604 New Orleans, LA, 132 pp.

Table 1. Characteristics of the Bonnet Carré Spillway after closure from 2008 – 2019 and number of sturgeon collected. Water quality measurements occurred after closure during sampling and included canals, ditches, and lakes.

| <b>Variable</b>                                                   | <b>2008</b>              | <b>2011</b>             | <b>2016</b>               | <b>2018</b>           | <b>2019 – 1<sup>st</sup> Opening</b> | <b>2019 – 2<sup>nd</sup> Opening<sup>1</sup></b> |
|-------------------------------------------------------------------|--------------------------|-------------------------|---------------------------|-----------------------|--------------------------------------|--------------------------------------------------|
| Calendar Days Open (number of days)                               | April 11 –<br>May 8 (28) | May 9 – June<br>20 (43) | January 10-<br>Feb 1 (23) | March 8 – 30<br>(23)  | Feb 27-April 11<br>(44)              | May 10-July 27<br>(79)                           |
| Bay Days                                                          | 3334                     | 11409                   | 3132                      | 2561                  | 6528                                 | 10890                                            |
| Percent Open                                                      | 45.7                     | 94.3                    | 60                        | 52.3                  | 58.9                                 | 48.0                                             |
| Maximum Discharge, cubic<br>meters/second (cms)                   | 4535                     | 8946                    | 5748                      | 5550                  | 6032                                 | 4559                                             |
| Total Volume Passed, billion cubic<br>meters                      | 7.47                     | 21.87                   | 6.93                      | 5.77                  | 15.1                                 | 21.4                                             |
| Mean (min-max) Water Temperature , °C<br>(MS River <sup>2</sup> ) | 16.8 (14.7 –<br>19.5)    | 22.7 (17.9 –<br>28.3)   | 6.8 (5.2 – 9.2)           | 12.8 (12.2 –<br>14.4) | 9.6 (6.5 – 14.5)                     | 25.2 (19.6 – 28.9)                               |
| Mean (min-max) Water Temperature , °C<br>(Spillway)               | 22.7 (16.4 –<br>31.1)    | 30.2 (26.7 –<br>32.9)   | 10.8 (6.6-<br>19.2)       | 24.0 (15.2-<br>29.8)  | N/A                                  | 30.5 (28.8-32.0)                                 |
| Mean (min-max) Dissolved Oxygen,<br>mg/l                          | 6.7 (3.2-9.0)            | 7.6 (3.5-<br>12.1)      | 11.9 (7.2-<br>13.9)       | 8.5 (0.4-<br>17.3)    | N/A                                  | 7.4 (4.1-13.6)                                   |

6-02-2021

|                                           |                  |                  |                  |                  |     |                  |
|-------------------------------------------|------------------|------------------|------------------|------------------|-----|------------------|
| Mean (min-max) Turbidity, NTU             | 47.4 (27.9-69.9) | 51.0 (34.5-71.8) | 39.1 (16.1-55.9) | 20.0 (10.5-38.1) | N/A | 17.7 (12.2-28.6) |
| Number of Pallid Sturgeon Collected       | 14               | 20               | 0                | 4                | N/A | 19               |
| Mean (min-max) Pallid Fork Length, mm     | 710 (528-884)    | 786 (676-924)    | -                | 691 (614-863)    | N/A | 783 (586-1035)   |
| Number of Shovelnose Sturgeon Collected   | 41               | 78               | 0                | 4                | N/A | 239              |
| Mean (min-max) Shovelnose Fork Length, mm | 668 (539-841)    | 608 (384-830)    | -                | 667 (643-690)    | N/A | 617 (400-928)    |
| Pallid:Shovelnose Ratio                   | 1:2.9            | 1:3.9            | 0                | 1:1.0            | N/A | 1:12.6           |

607

608 <sup>1</sup> – Water quality and number of sturgeon collected occurred after the second opening.

609 <sup>2</sup> – Water temperature in the Mississippi River at Baton Rouge, LA

610



6-02-2021

611

612

| Table 2. Sampling effort by gear expended each year to capture sturgeon after operation of the Bonnet Carré Spillway. Number of days leaking was confined to the low bays once the structure was closed until the last sturgeon was captured. The 2019 values represent the second opening-closing because access was restricted after the first opening-closing. |                        |                          |                           |                      |                        |                        |
|-------------------------------------------------------------------------------------------------------------------------------------------------------------------------------------------------------------------------------------------------------------------------------------------------------------------------------------------------------------------|------------------------|--------------------------|---------------------------|----------------------|------------------------|------------------------|
| Year                                                                                                                                                                                                                                                                                                                                                              | Electroshocking, hours | Gill/Trammel Nets, hours | Conventional Seine, hauls | Gillnet Seine, hours | Number of Days Sampled | Number of Leaking Days |
| 2008                                                                                                                                                                                                                                                                                                                                                              | 15.0                   | 160                      | 35                        | 2                    | 25                     | 32                     |
| 2011                                                                                                                                                                                                                                                                                                                                                              | 8.2                    | 30                       | 10                        | 16.5                 | 12                     | 7                      |
| 2016                                                                                                                                                                                                                                                                                                                                                              | 5.5                    | 167                      | 11                        | 12                   | 18                     | 9                      |
| 2018                                                                                                                                                                                                                                                                                                                                                              | 2.7                    | 7                        | 0                         | 8                    | 5                      | 7                      |
| 2019                                                                                                                                                                                                                                                                                                                                                              | 5.6                    | 8                        | 10                        | 25                   | 10                     | 6                      |
| Total                                                                                                                                                                                                                                                                                                                                                             | 37.0                   | 372                      | 66                        | 63.5                 | 70                     | 61                     |

613

614

6-02-2021

615

616

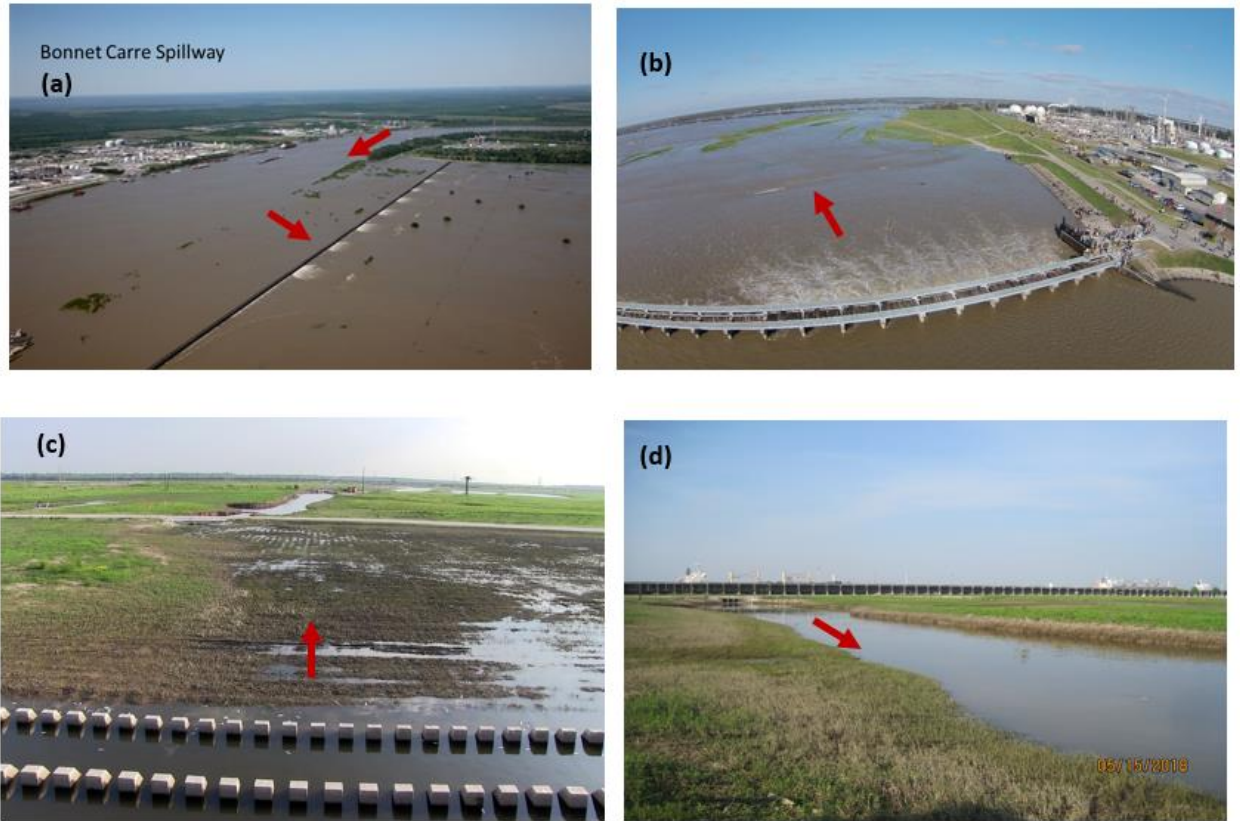

617

618 Figure 1. Bonnet Carré Spillway structure, stilling basin, and outflows. Red arrows indicate direction  
619 of flow: aerial looking north upriver and through the structure during the 2011 opening (a), aerial  
620 looking east from structure towards Lake Pontchartrain during the 2011 opening (b), ground looking  
621 east from stilling basin towards Lake Pontchartrain after closure (c), and ground looking west at  
622 Barbar's Canal toward structure after closure (d). Aerial views provided by USACE New Orleans  
623 District.

624

625

6-02-2021

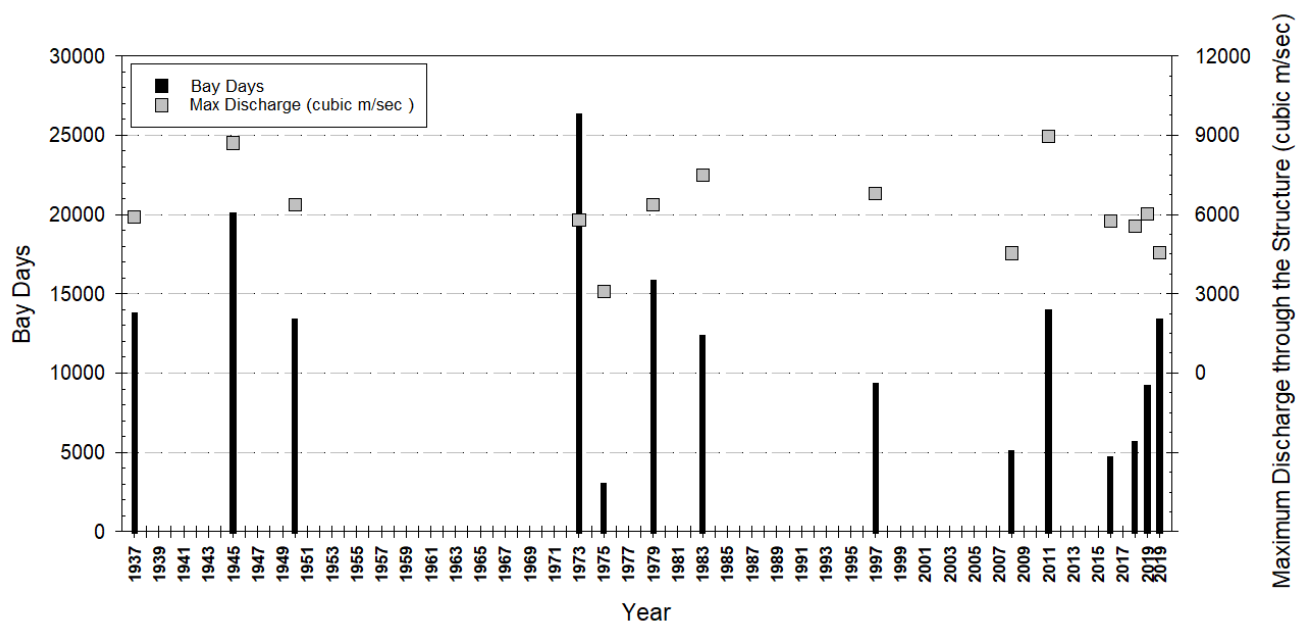

626

Figure 2. Frequency, maximum discharge, and bay days (i.e., number of bays open per day) for the 14 openings of the Bonnet Carré Spillway since the structure was constructed in 1931. Sturgeon sampling occurred after the structure was closed from 2008 to 2019. The structure was open twice during 2019.

627

628

629

630

6-02-2021

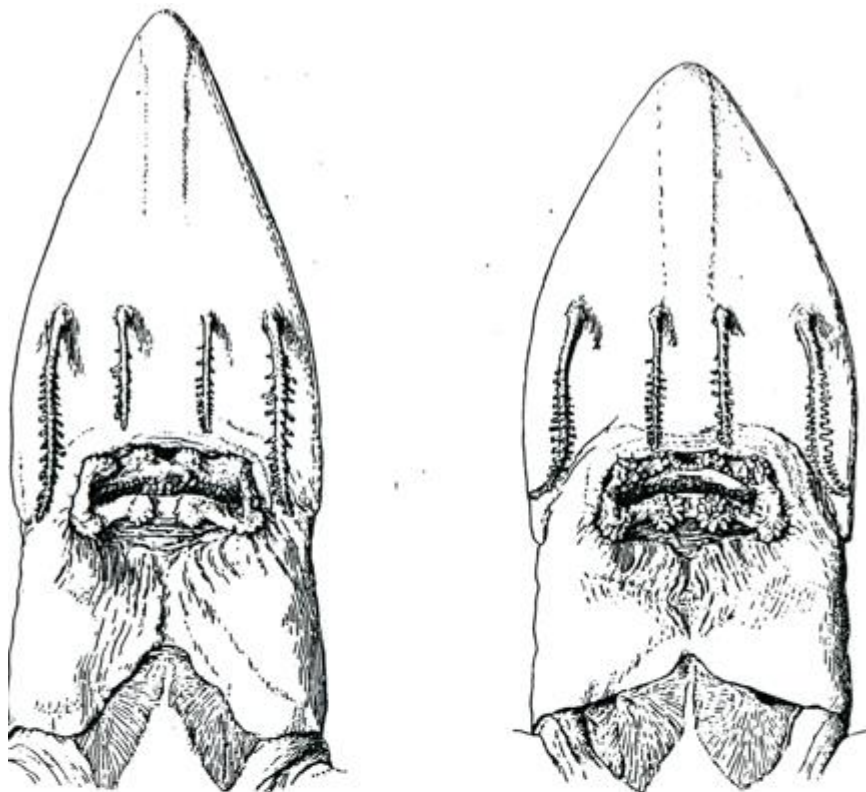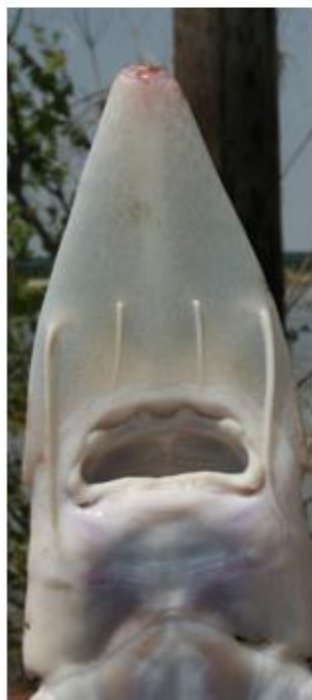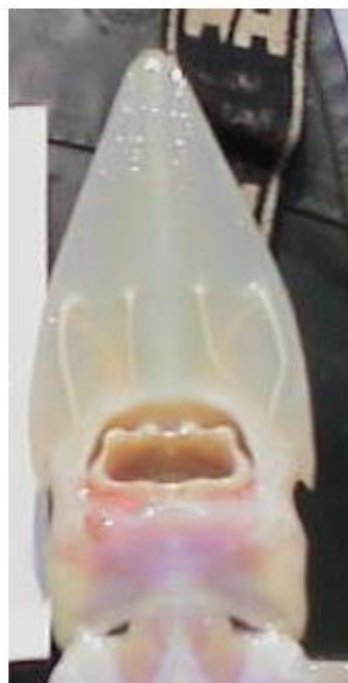

631

6-02-2021

632

Figure 3. Ventral view of Pallid (left) and Shovelnose (right) Sturgeon of the Lower Mississippi River. Pallid Sturgeon have shorter inner barbels relative to outer barbels, longer head, and larger mouth. Top drawings are from Forbes and Richardson (1905).

6-02-2021

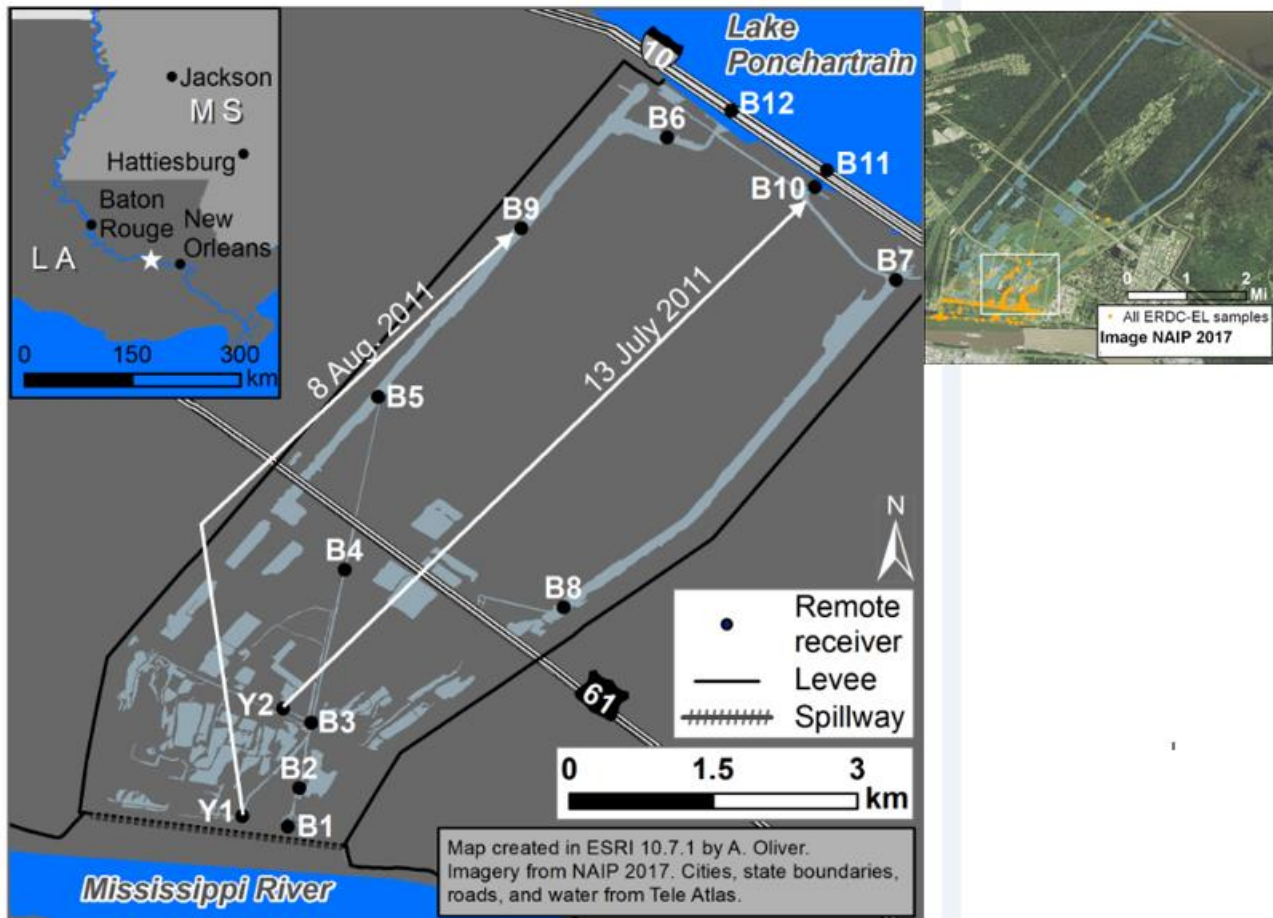

633

634

635 Figure 4. Sampling locations in the Bonnet Carré Spillway. The smaller inset map displays the  
636 concentration of sturgeon sampling during all openings from 2008 - 2019. The larger map displays  
637 the location of acoustic telemetry receivers in 2011 and arrows indicated those receivers moved to  
638 new locations. The letter “Y” refers to the Y-Canal and the letter “B” refers to Barbar’s canal and  
639 receiving canals. The blue color denotes all waterbodies in the floodway after closure of the  
640 structure. The stilling basin is immediately below the Spillway structure.

641

642

643

644

645

6-02-2021

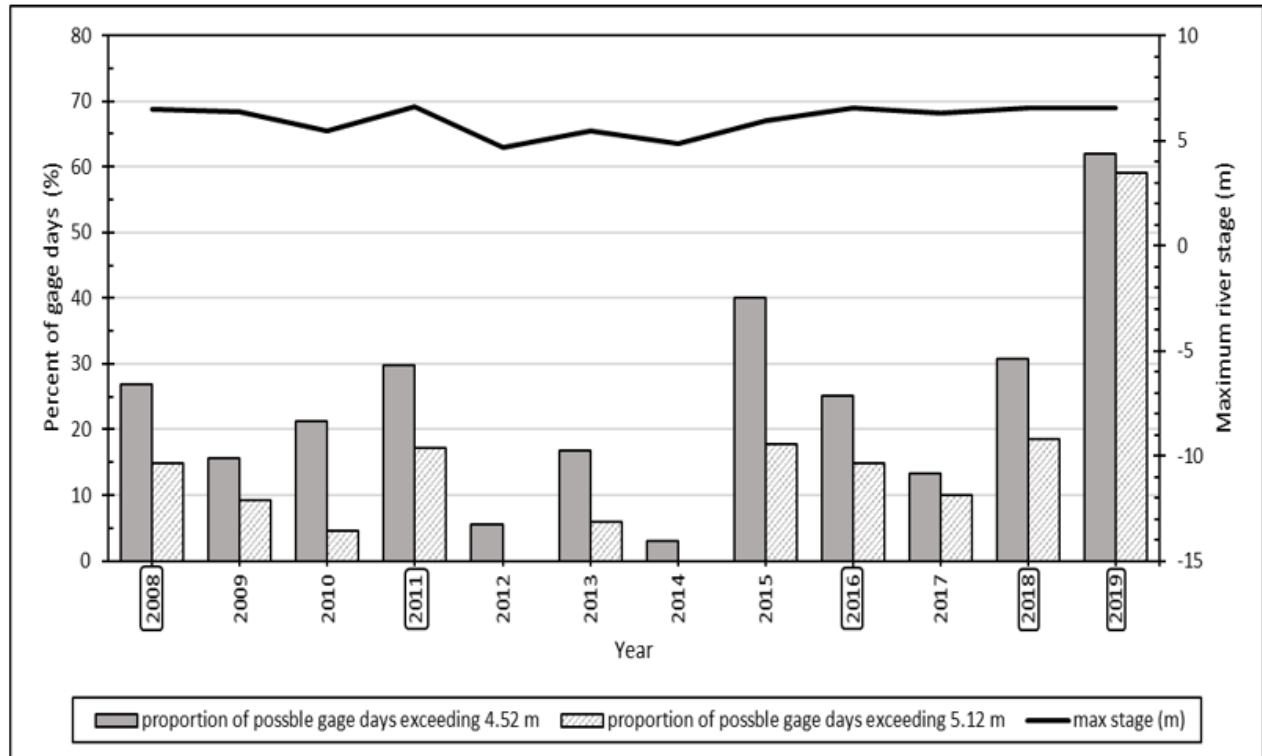

646

647 Figure 5. Percentage of gage days each year from 2008 – 2019 that water leaked through the pins at  
648 the low bays (gage > 4.52 m) and high bays (gage >5.12 m). Some years had incomplete gage  
649 records and therefore percent gage days during each year based on available records was used to  
650 denote leakage. Mississippi River stage shown for the Bonnet Carré gage (01280). Years when the  
651 Bonnet Carré structure was open are outlined.

652

6-02-2021

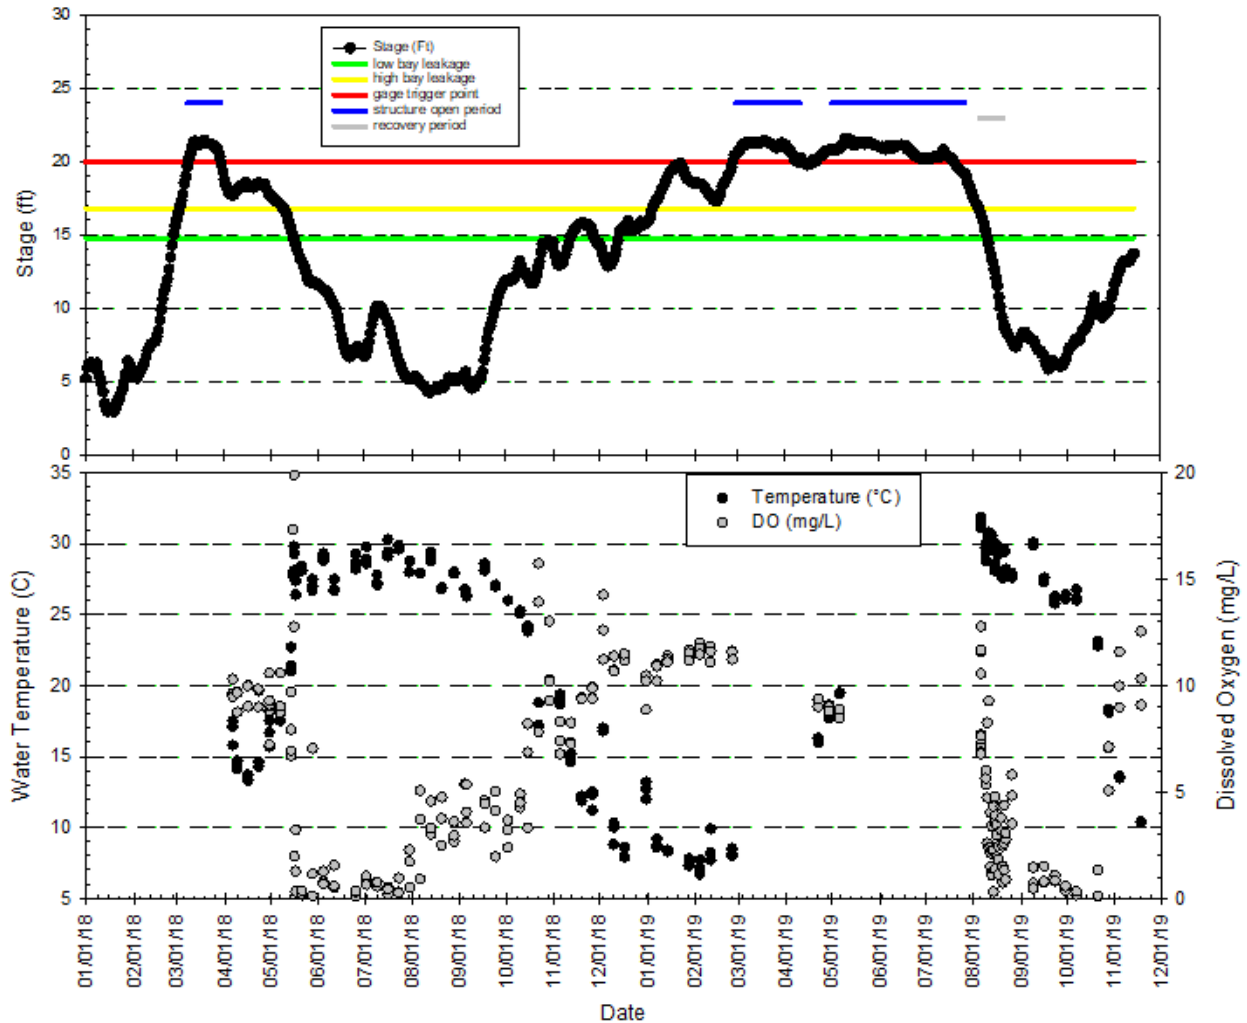

653  
654 Figure 6. Pattern of leakage (top panel) and water temperature and dissolved oxygen measurements  
655 (bottom panel) taken in Bonnet Carre' Spillway Stilling Basin from April 2018 through November  
656 2019. Continuous leakage through the low bays was noted from 14 December 2018 through 10  
657 August 2019.

658  
659  
660



6-02-2021

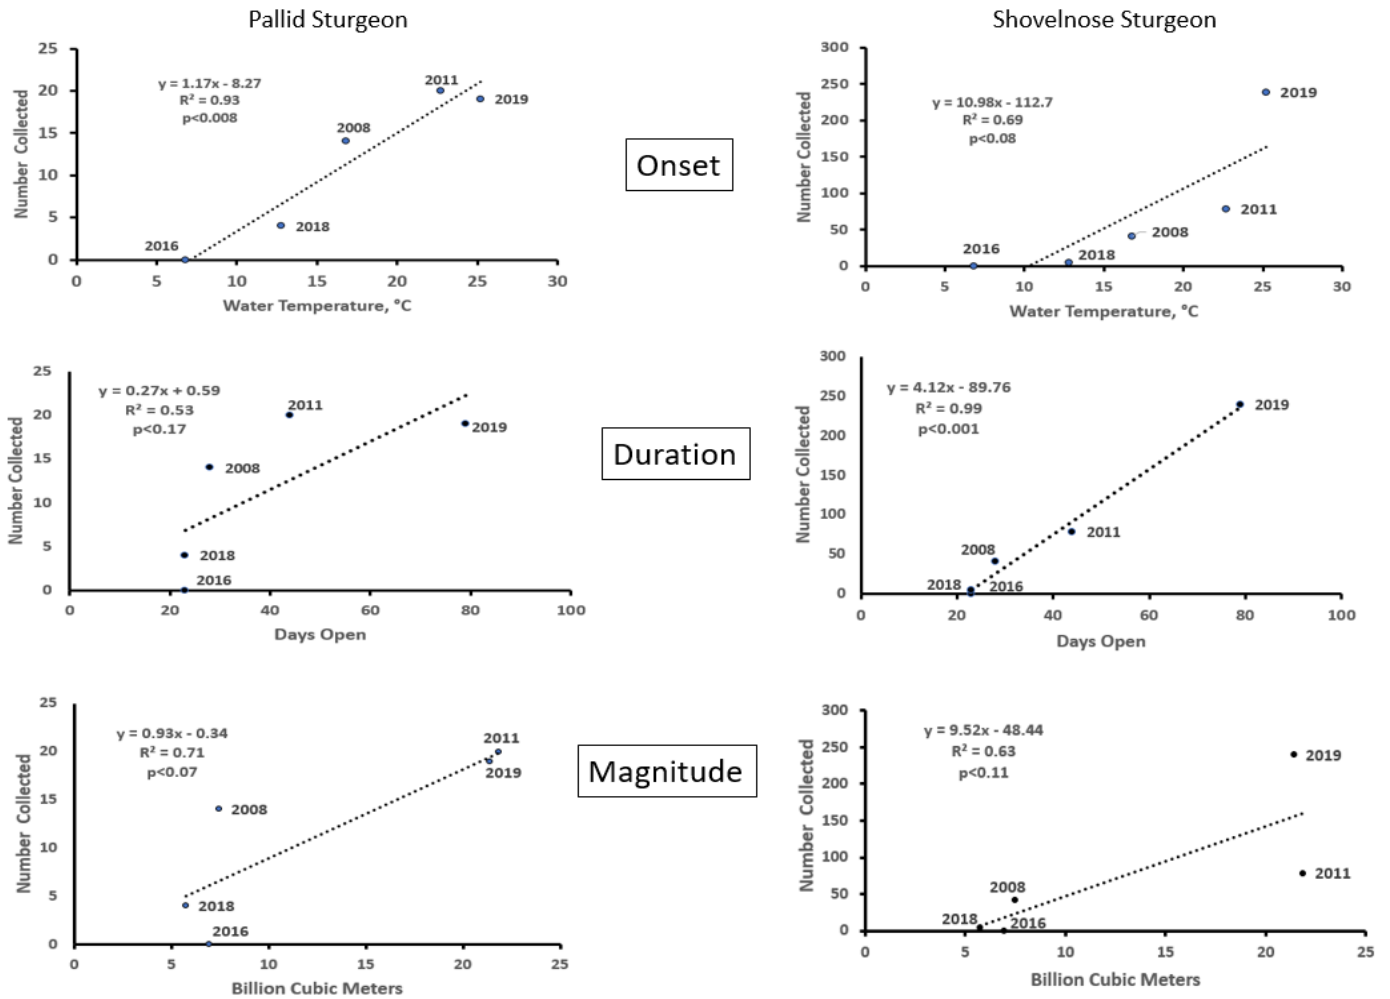

661

662

663 Figure 7. Regression analysis of number of Pallid Sturgeon and Shovelnose Sturgeon captured as a  
664 function of Mississippi River mean water temperature (°C) at Baton Rouge, LA during operation of  
665 the Bonnet Carré Spillway (Onset), number of days the structure was open (Duration), and total  
666 volume (billion cubic meters) of water passed through the structure (Magnitude). Year indicated by  
667 each data point.

668

6-02-2021

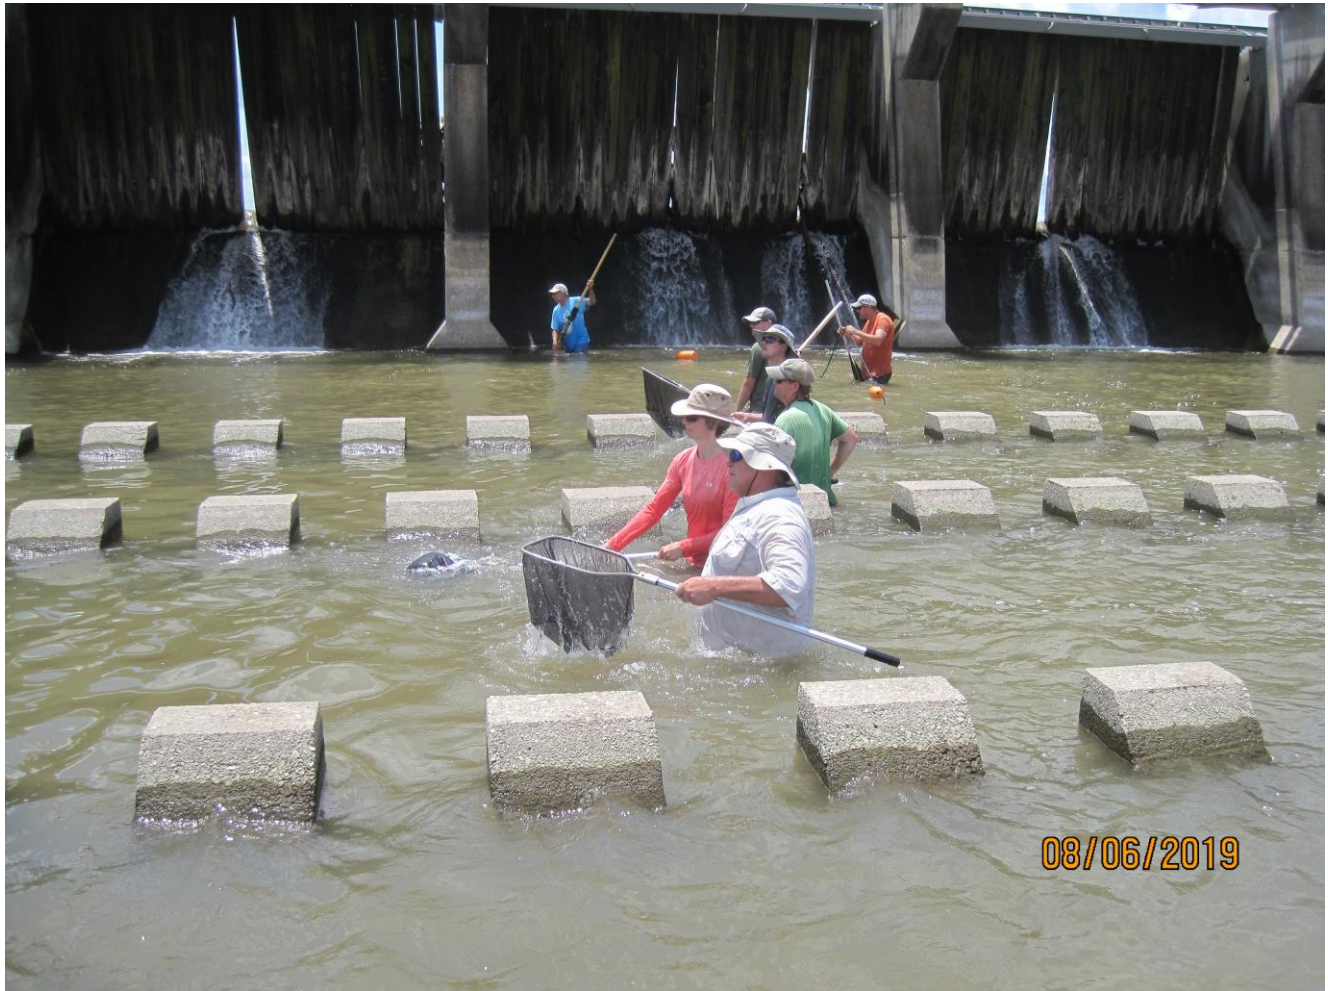

669

670

671 Figure 8. Collecting efforts in the stilling basin require at least 10 people - 3 pulling the modified  
672 gillnet-seine in the wide section nearest the structure, four wading between the baffles with large  
673 dipnets, one data recorder, and a transport team assisting with sturgeon measurements, tagging, and  
674 release back into the Mississippi River. Two additional people moving a block net to corral fish will  
675 usually increase capture rates. Leakage from the Mississippi River thru pins is evident.
